# Supplementary material
Source: PubMed Central journal article supplement (PMC2517635)
Supplement: neo1009_0908SD1.pdf [file neo1009_0908SD1.pdf]

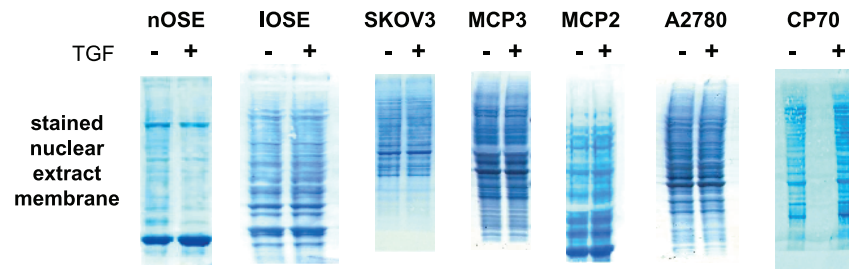

**Figure W1.** Coomassie-stained membranes used to ensure equal quantity of protein sample loading for Western blot analysis shown in Figure 2A.

**Table W1.** Primer Sequences Used in the Study.

|                        | Sequence                                                                                                           | Size (bp) | $T_m$ (°C) |
|------------------------|--------------------------------------------------------------------------------------------------------------------|-----------|------------|
| ChIP-PCR               |                                                                                                                    |           |            |
| <i>ADAM19</i> promoter | F: TCACCTCTGAGTGTACCCAAAG<br>R: GATTGTGGTGGACGCGG                                                                  | 133       | 60         |
| <i>ADAM19</i> exon     | F: TTTGTTCCCACGTTCTGCG<br>R: GAACGGCGGAAAGAGAAGC                                                                   | 150       | 60         |
| <i>ADAM19</i> intron   | F: GCTCCATGGGAGCAGTATTCAT<br>R: AGGCCAGGCTAGAGATATGCTG                                                             | 141       | 60         |
| RT-PCR                 |                                                                                                                    |           |            |
| <i>SMAD4</i>           | F: GTCTTTGATTTGCGTCAGTGTTCAT<br>R: CAGCTGACAGACTGATAGCTGGAG                                                        | 151       | 60         |
| <i>TGFBR1</i>          | F: AGTTAAGGCCAAATATCCCAAACAG<br>R: CCTAGCTGCTCCATTGGCAT                                                            | 101       | 59         |
| <i>TGFBR2</i>          | F: ATTCCAGCTTCTGGCTCAAC<br>R: CTCACTGAAGCGTTCTGCCAC                                                                | 123       | 60         |
| <i>ADAM19</i>          | F: CAAGCTGAGGCAACAGTTCAGT<br>R: CGCAGGATTTCCGGAGTGT                                                                | 132       | 60         |
| <i>GAPDH</i>           | F: CCCCTTCATTGACCTCAACTACAT<br>R: CGTCTCTGAAGATGGTGA                                                               | 135       | 60         |
| Bisulfite sequencing   |                                                                                                                    |           |            |
| <i>ADAM19</i> promoter | F: AGAGGGGTTTAGTTTAATTTTGAAG<br>R: CTCAACCATACTACCCACTACCC                                                         | 340       | 60         |
| <i>ADAM19</i> exon     | F: GGGTAGTGGGTAGGTATGGTTGAG<br>R: CRA CCTCTACCACCTCCAAAAC                                                          | 347       | 60         |
| MSP                    |                                                                                                                    |           |            |
| <i>ADAM19</i>          | MF: AAGGCGTTTGGTATAGTGC<br>MR: AACGCGACCTATAAAAAATCG<br>UF: TTAAAGGTGTTTGGTATAGTGT<br>UR: AACACAACCTATAAAAAATCAAAA | 101       | 60         |
| <i>ADAM19</i>          | MF: AAGGCGTTTGGTATAGTGC<br>MR: AACGCGACCTATAAAAAATCG<br>UF: TTAAAGGTGTTTGGTATAGTGT<br>UR: AACACAACCTATAAAAAATCAAAA | 101       | 60         |
| <i>SMAD4</i> mutation  |                                                                                                                    |           |            |
| Exon 9                 | F: TATTAAGCATGCTATACAATCTG<br>R: CTTCCACCCAGATTTCAATTC<br>seq: TTTTGACAACAAATAGAGCTTTAAGTC                         | 330       | 58         |
| Exon 11                | F: CCAAAAAGTGTGCAGCTTGTTG<br>R: CAGTTTCTGTCTGCTAGGAG<br>seq: TATTTGTAGTCCACCATC                                    | 554       | 58         |

**Table W2.** Mutations in *SMAD4* in Ovarian Cancer Cell Lines.

|         | IOSE | SKOV3         | MCP3 | MCP2 | A2780                    | CP70 |
|---------|------|---------------|------|------|--------------------------|------|
| Exon 9  | N    | N             | N    | N    | Codon 404 (TA insertion) | N    |
| Exon 11 | N    | Intron/T to C | N    | N    | N                        | N    |

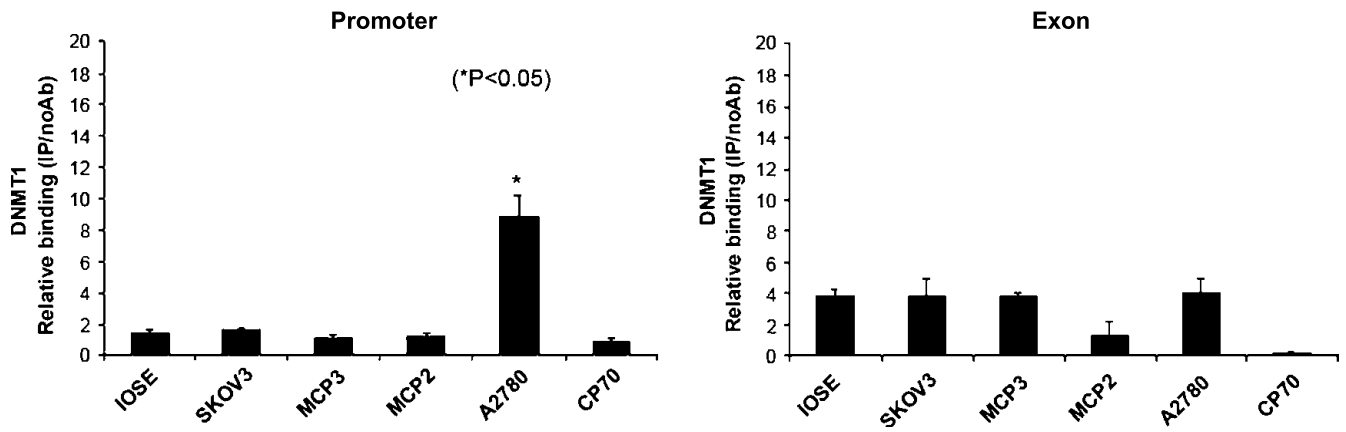

**Figure W2.** Chromatin immunoprecipitation–PCR analysis of *ADAM19* in ovarian cancer cells. Chromatin immunoprecipitation assays were performed with antibodies directed against DNA methyltransferase 1 (DNMT1; primers used to amplify two regions of *ADAM19* are shown in Figure 2A). The relative binding of each antibody to the corresponding region was measured by quantitative PCR. Error bar indicates SD calculated from triplicates. \* $P < .05$ .
